# Supplementary material for: Loss of glutamate transporter eaat2a leads to aberrant neuronal excitability, recurrent epileptic seizures, and basal hypoactivity
Source: PubMed Central journal article supplement (PMC9297858; doi:10.1002/glia.24106), 2021-10-30
Supplement: GLIA-70-196-s003.pdf [file GLIA-70-196-s003.pdf]

## **SUPPORTING INFORMATION**

### **Loss of glutamate transporter *eaat2a* leads to aberrant neuronal excitability, recurrent epileptic seizures and basal hypoactivity**

Adriana L. Hotz, Ahmed Jamali, Nicolas N. Rieser, Stephanie Niklaus, Ecem Aydin, Sverre Myren-Svelstad, Laetitia Lalla, Nathalie Jurisch-Yaksi\*, Emre Yaksi\* & Stephan C.F. Neuhaus<sup>\*,§</sup>

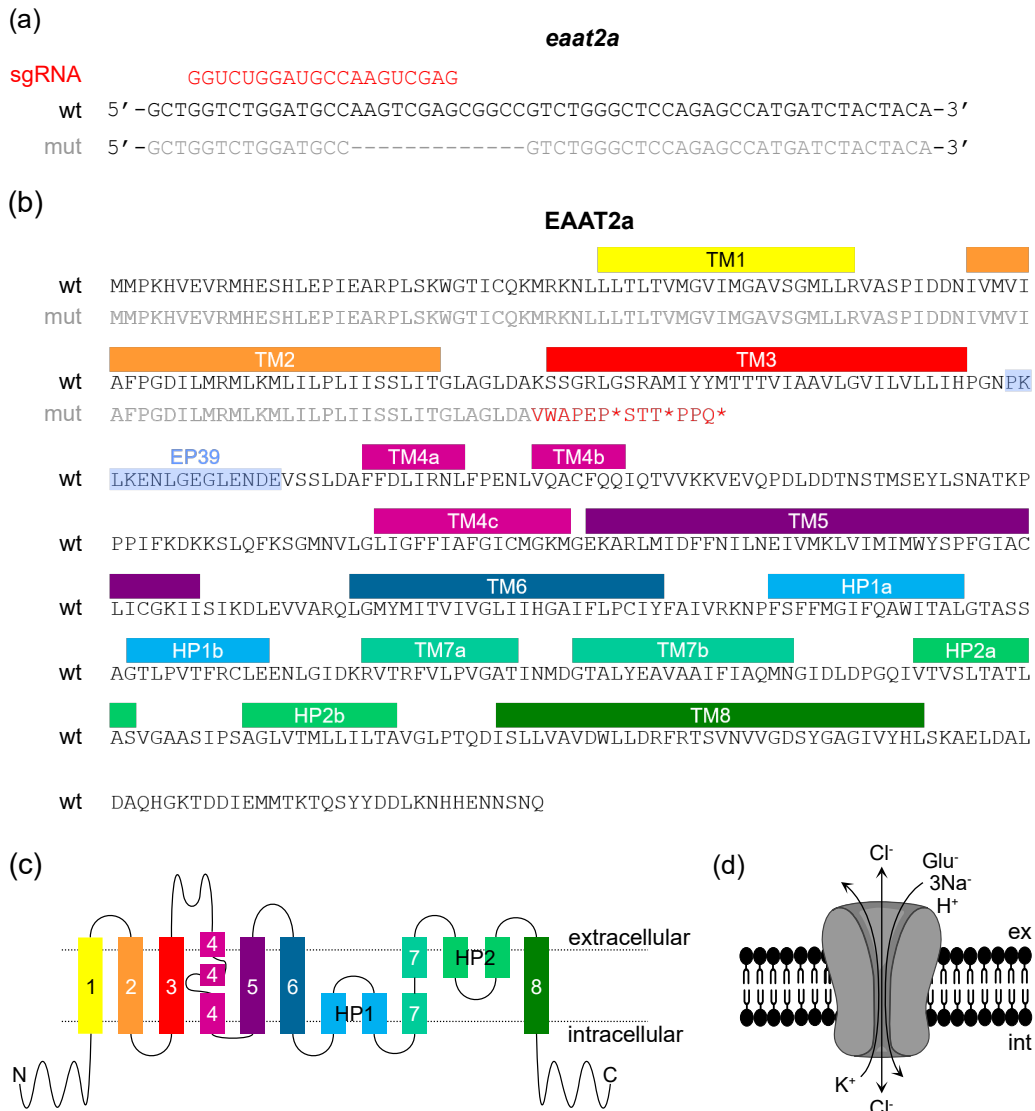

**Supplementary Figure 1: Wild-type and mutant *eaat2a* sequence.**

(a) Genomic DNA sequence of wild-type (black font) and mutant (gray font) *eaat2a* harboring a -13 base pair deletion. Target sequence of the single guide RNA used is represented in red font.

(b) EAAT2a wild-type (black font) and mutant (gray font) protein sequence with corresponding transmembrane domains (TMs) and hairpins (HPs) labelled. The -13 bp mutation leads to three premature stop codons (\*) within TM3 at amino acids 109, 113 and 117. EP39 (epitope 39) highlights the anti-EAAT2a antibody recognition site.

(c) Two-dimensional schematic representation of EAAT2a protein structure. Color code for TM and HP labelling corresponds to color code in (b).

(d) Stoichiometry of EAATs.

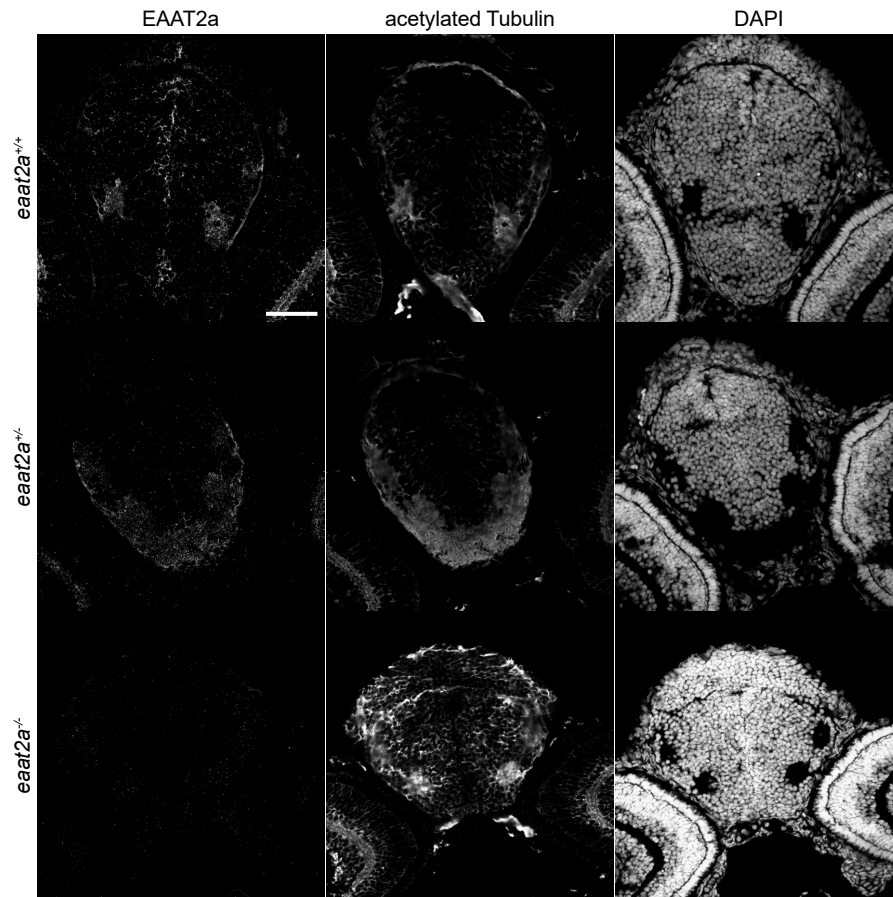

**Supplementary Figure 2: Confirmation of EAAT2a protein knockout.**

Immunostaining of EAAT2a and acetylated tubulin (acT) together with DAPI on cryosections of 3 dpf *eaat2a*<sup>+/+</sup> (top row), *eaat2a*<sup>+/-</sup> (middle row) and *eaat2a*<sup>-/-</sup> (bottom row) larvae. Scale bar is 50  $\mu$ m.

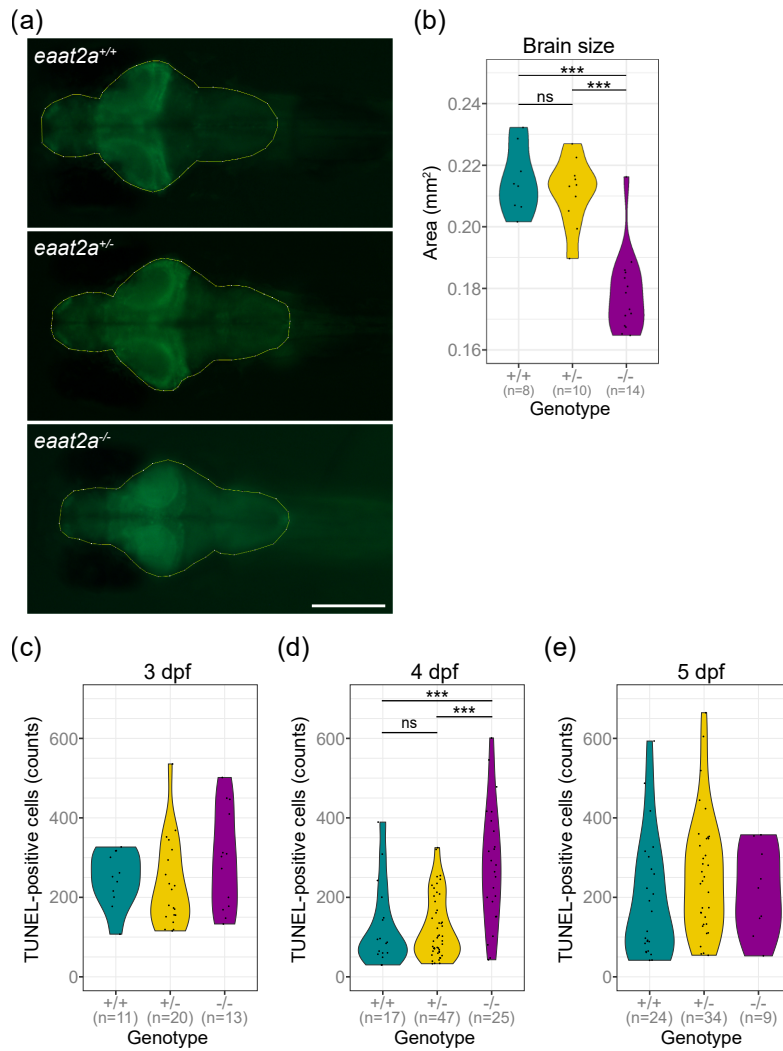

**Supplementary Figure 3: In *eaat2a*<sup>-/-</sup> mutants, overall brain size was decreased at 5 dpf and apoptosis transiently increased at 4 dpf.**

(a) Representative wide-field microscopy images of *eaat2a*<sup>+/+</sup> (top), *eaat2a*<sup>+/-</sup> (middle) and *eaat2a*<sup>-/-</sup> (bottom) larvae. Yellow selection shows region of interest used to measure total brain area by Fiji ImageJ (National Institutes of Health). Scale bar is 250  $\mu\text{m}$ .

(b) Brain area was reduced at 5 dpf in *eaat2a*<sup>-/-</sup> mutants compared to their *eaat2a*<sup>+/+</sup> ( $p = 6.4\text{e-}4$ ) and *eaat2a*<sup>+/-</sup> ( $p = 6.0\text{e-}4$ ) siblings, while the area of *eaat2a*<sup>+/-</sup> was comparable to *eaat2a*<sup>+/+</sup> ( $p = 0.71$ )

(c-e) The number of TUNEL-positive cells in the brain of *eaat2a*<sup>-/-</sup> mutants was increased at 4 dpf compared to their *eaat2a*<sup>+/+</sup> ( $p = 3.9\text{e-}4$ ) and *eaat2a*<sup>+/-</sup> ( $p = 5.0\text{e-}5$ ) siblings (d), but similar at 3 dpf (c,  $p_{+/+} = 0.56$ ,  $p_{+/-} = 0.44$ ) and 5 dpf (e,  $p_{+/+} = 0.62$ ,  $p_{+/-} = 0.61$ ). The number in *eaat2a*<sup>+/-</sup> was comparable to *eaat2a*<sup>+/+</sup> in all stages ( $p_{3dpf} = 0.65$ ,  $p_{4dpf} = 0.77$ ,  $p_{5dpf} = 0.16$ ).

Significance levels: \*\*\* $p \leq 0.001$ , ns = not significant ( $p > 0.05$ ), Dunn Kruskal-Wallis multiple comparison test ( $p$ -adjustment: Benjamini-Hochberg method)

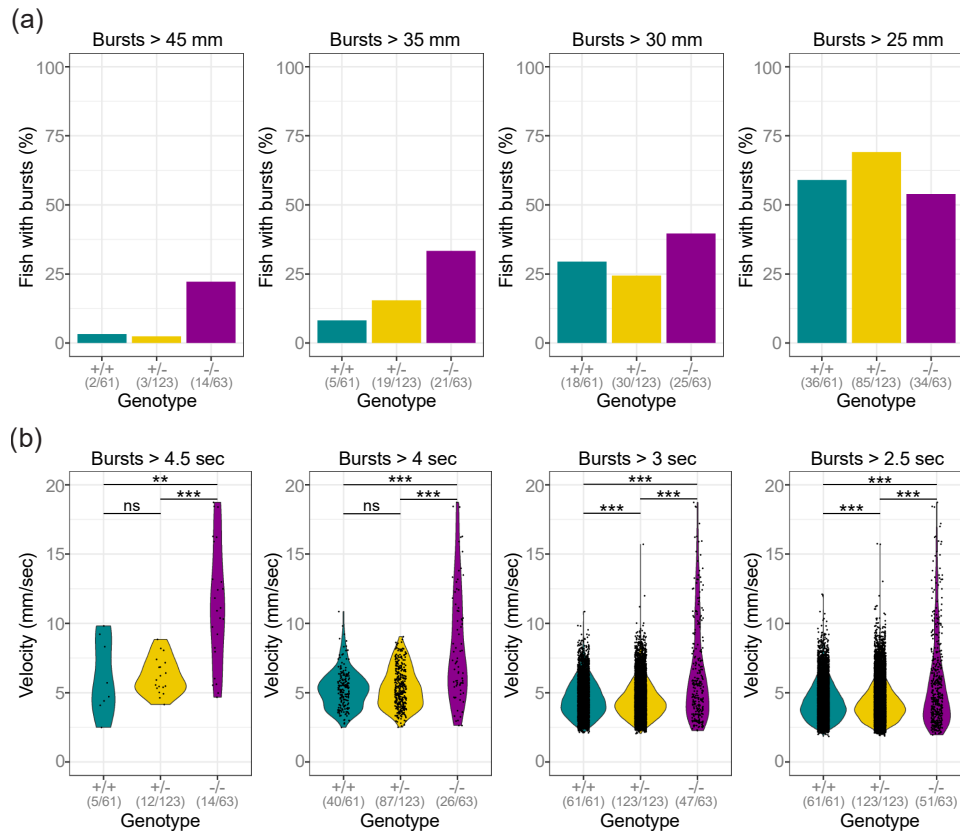

**Supplementary Figure 4: Swim bursts per five-second integral in 5 dpf *eaat2a*<sup>-/-</sup> larvae were more frequent at higher thresholds.**

(a) Proportion of fish showing one or more bursts bigger than threshold indicated in headings (mm).

(b) Velocity of all bursts lasting longer than threshold indicated in headings (sec). Significance levels:

\*\*\* $p \leq 0.001$ , \*\* $p \leq 0.01$ , ns = not significant ( $p > 0.05$ ), two-sample Kolmogorov-Smirnov test.

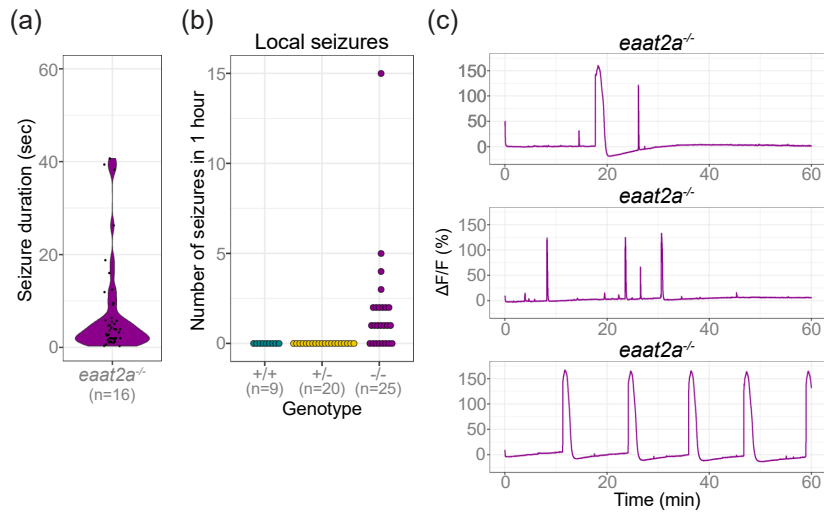

**Supplementary Figure 5: 5 dpf *eaat2a*<sup>-/-</sup> mutants showed not only global but also local seizures not recruiting neurons of the anterior forebrain and lasting less than a minute.**

(a) Duration of local seizures present in *eaat2a*<sup>-/-</sup> mutants (median 3.4 sec (std  $\pm$  10.3 sec)).

(b) Number of spontaneous local seizures per animal during 60 minutes.

(c) Change in GCaMP5G fluorescence ( $\Delta F/F$ ) over time recorded across the entire brain of three representative *eaat2a*<sup>-/-</sup> mutant larvae displaying local and global (top), exclusively local (middle) or exclusively global (bottom) spontaneous seizures.

| Primer name                               | Primer sequence (5' – 3')                                                            | Amplicon (bp) |
|-------------------------------------------|--------------------------------------------------------------------------------------|---------------|
| <i>eaat2a</i><br>sgRNA sg1                | GAAATTAATACGACTCACTATAGGCTCTGGATGCCAAGTCGAG<br>GTTTTAGAGCTAGAAATAGC                  | 20            |
| <i>eaat2a</i><br>sgRNA sg2                | AAAAGCACCGACTCGGTGCCACTTTTTCAAGTTGATAACGGACT<br>AGCCTTATTTTAACTTGCTATTTCTAGCTCTAAAAC |               |
| <i>eaat2a</i> sense<br>fw genotyping      | GATGCAGTCGTATGGGAA                                                                   | 204           |
| <i>eaat2a</i> antisense<br>rev genotyping | CCTTCTCCCAGATTCTCC                                                                   |               |

**Supplementary Table 1: List of primers used for CRISPR sgRNA synthesis and target region amplification.**

| Gene           | www.ensembl.org/index.html | Fw primer (5' – 3')        | Rev primer (5' – 3')     | Amplicon (bp) |
|----------------|----------------------------|----------------------------|--------------------------|---------------|
| <i>g6pd</i>    | ENSDARG00000071065         | CTGGACCTGACCTACCATAGCAG    | AGGCTTCCCTCAACTCATCACTG  | 127           |
| <i>b2m</i>     | ENSDARG00000053136         | GACAAAGAAGTTTGTAGTTGGGAGCC | GAATCCATCGCTCCATCG       | 76            |
| <i>eaat1b</i>  | ENSDARG00000043148         | CTGGTTCAAGCCTGCACTCAAC     | CTCCTGCGTAGCGTTTCGTC     | 111           |
| <i>eaat2b</i>  | ENSDARG00000052138         | GGAATCGAACTTGATCCTGGTC     | ATGTCTTGAGTCGGCAGTCC     | 143           |
| <i>mglur3</i>  | ENSDARG00000031712         | GTCTTGATGGCAGGAACTCTACC    | CCACTCCATCTCCATACGCATC   | 117           |
| <i>mglur5b</i> | ENSDARG00000102067         | CCTGGTCGGAGAGTTTCTGCTG     | GCAGACTGCAGCTTTATGGTGATC | 114           |
| <i>gad1b</i>   | ENSDARG00000027419         | ACAACAATGAGCGCTTCACG       | TGAGGATCTCCACCACTTCGAG   | 126           |
| <i>gabral</i>  | ENSDARG00000068989         | GGTCACCAATGCTCTGGCTG       | GAGACCAGGCCTAAGACGATTG   | 130           |

**Supplementary Table 2: List of primers used for qRT-PCR experiments**

| Figure | Genotypes or timepoints compared | Age (dpf) | Analysis                                                                        | n                                         | Z, V, W, t values | p-value |
|--------|----------------------------------|-----------|---------------------------------------------------------------------------------|-------------------------------------------|-------------------|---------|
| 2b     | +/- to +/+                       | 3         | Dunn Kruskal Wallis multiple comparison test with Benjamini-Hochberg correction | n(+/+) = 17<br>n(+/-) = 26<br>n(-/-) = 23 | Z = -0.27         | 0.79    |
| 2b     | -/- to +/+                       | 3         |                                                                                 |                                           | Z = -4.6          | 5.5e-6  |
| 2b     | +/- to -/-                       | 3         |                                                                                 |                                           | Z = 4.9           | 3.5e-6  |
| 2b     | +/- to +/+                       | 4         |                                                                                 |                                           | Z = -0.20         | 0.84    |
| 2b     | -/- to +/+                       | 4         |                                                                                 |                                           | Z = -5.1          | 3.9e-7  |
| 2b     | +/- to -/-                       | 4         |                                                                                 |                                           | Z = 5.5           | 1.0e-7  |
| 2b     | +/- to +/+                       | 5         |                                                                                 |                                           | Z = 0.18          | 0.85    |
| 2b     | -/- to +/+                       | 5         |                                                                                 |                                           | Z = -5.2          | 3.7e-7  |
| 2b     | +/- to -/-                       | 5         |                                                                                 |                                           | Z = 5.9           | 8.8e-9  |
| 2b     | +/- to +/+                       | 6         |                                                                                 |                                           | Z = 0.067         | 0.95    |
| 2b     | -/- to +/+                       | 6         |                                                                                 |                                           | Z = -5.2          | 2.6e-7  |
| 2b     | +/- to -/-                       | 6         |                                                                                 |                                           | Z = 5.9           | 1.2e-8  |
| 2b     | +/- to +/+                       | 7         |                                                                                 |                                           | Z = 0.084         | 0.93    |
| 2b     | -/- to +/+                       | 7         |                                                                                 |                                           | Z = -5.2          | 2.7e-7  |
| 2b     | +/- to -/-                       | 7         |                                                                                 |                                           | Z = 5.9           | 1.1e-8  |
| 2c     | +/- to +/+                       | 6         | Dunn Kruskal Wallis multiple comparison test with Benjamini-Hochberg correction | n(+/+) = 37<br>n(+/-) = 56<br>n(-/-) = 42 | Z = 0.14          | 0.88    |
| 2c     | -/- to +/+                       | 6         |                                                                                 |                                           | Z = -0.71         | 0.71    |
| 2c     | +/- to -/-                       | 6         |                                                                                 |                                           | Z = 0.86          | 1.0     |
| 2c     | +/- to +/+                       | 7         |                                                                                 |                                           | Z = 0.068         | 0.94    |
| 2c     | -/- to +/+                       | 7         |                                                                                 |                                           | Z = -1.5          | 0.19    |

|    |                                     |    |                                                                                 |                                                                                                           |                 |           |
|----|-------------------------------------|----|---------------------------------------------------------------------------------|-----------------------------------------------------------------------------------------------------------|-----------------|-----------|
| 2c | +/- to -/-                          | 7  | Dunn Kruskal Wallis multiple comparison test with Benjamini-Hochberg correction | n(+/+) = 37<br>n(+/-) = 56<br>n(-/-) = 42                                                                 | Z = 1.6         | 0.35      |
| 2c | +/- to +/+                          | 8  |                                                                                 |                                                                                                           | Z = 0.060       | 0.95      |
| 2c | -/- to +/+                          | 8  |                                                                                 |                                                                                                           | Z = -3.2        | 3.5e-3    |
| 2c | +/- to -/-                          | 8  |                                                                                 |                                                                                                           | Z = 3.2         | 2.2e-3    |
| 2c | +/- to +/+                          | 9  |                                                                                 |                                                                                                           | Z = 0.060       | 0.95      |
| 2c | -/- to +/+                          | 9  |                                                                                 |                                                                                                           | Z = -3.2        | 3.5e-3    |
| 2c | +/- to -/-                          | 9  |                                                                                 |                                                                                                           | Z = 3.2         | 2.2e-3    |
| 2c | +/- to +/+                          | 10 |                                                                                 |                                                                                                           | Z = 0.11        | 0.91      |
| 2c | -/- to +/+                          | 10 |                                                                                 |                                                                                                           | Z = -2.9        | 5.1e-3    |
| 2c | +/- to -/-                          | 10 |                                                                                 |                                                                                                           | Z = 3.0         | 7.1e-3    |
| 2c | +/- to +/+                          | 11 |                                                                                 |                                                                                                           | Z = -0.16       | 0.87      |
| 2c | -/- to +/+                          | 11 |                                                                                 |                                                                                                           | Z = -3.1        | 6.8e-3    |
| 2c | +/- to -/-                          | 11 |                                                                                 |                                                                                                           | Z = 2.9         | 5.8e-3    |
| 2g | +/+ & +/- to -/- (after stimuli)    | 5  | Two-sided Wilcoxon rank-sum test                                                | n(+/+ & +/-) = 5<br>n(-/-) = 8                                                                            | W = 858         | 7.7e-8    |
| 3c | +/- to +/+                          | 5  | Dunn Kruskal Wallis multiple comparison test with Benjamini-Hochberg correction | n(+/+) = 61<br>n(+/-) = 123<br>n(-/-) = 63                                                                | Z = -1.2        | 0.23      |
| 3c | -/- to +/+                          | 5  |                                                                                 |                                                                                                           | Z = -10.2       | 2.9e-24   |
| 3c | +/- to -/-                          | 5  |                                                                                 |                                                                                                           | Z = 10.6        | 7.6e-26   |
| 3f | +/+ to +/-                          | 5  | two-sample Kolmogorov-Smirnov test                                              | n(+/+) = 60<br>n(+/-) = 121<br>n(-/-) = 42                                                                | D = 0.034       | 0.20      |
| 3f | +/+ to -/-                          | 5  |                                                                                 |                                                                                                           | D = 0.36        | < 2.2e-16 |
| 3f | +/- to -/-                          | 5  |                                                                                 |                                                                                                           | D = 0.35        | 6.7e-16   |
| 3j | <i>eaat2a</i> <sup>-/-</sup> to PTZ | 5  | Two-sided Wilcoxon rank-sum test                                                | n <sub>PTZ</sub> = 6 fish, 10 seizures;<br>n <sub><i>eaat2a</i><sup>-/-</sup></sub> = 8 fish, 40 seizures | z = 2.2         | 0.026     |
| 3k | <i>eaat2a</i> <sup>-/-</sup> to PTZ | 5  |                                                                                 |                                                                                                           | z = 3.7         | 2.2e-4    |
| 4j | +/- to +/+                          | 5  | Dunn Kruskal Wallis multiple comparison test with Benjamini-Hochberg correction | n(+/+) = 9<br>n(+/-) = 20<br>n(-/-) = 23                                                                  | Z = 0.18        | 0.86      |
| 4j | -/- to +/+                          | 5  |                                                                                 |                                                                                                           | Z = -3.6        | 4.1e-4    |
| 4j | +/- to -/-                          | 5  |                                                                                 |                                                                                                           | Z = 4.9         | 2.7e-6    |
| 5e | basal to preictal                   | 5  | Wilcoxon signed rank test                                                       | n(+/+ & +/-) = 6<br>n(-/-) = 8                                                                            | V = 18          | 1         |
| 5e | basal to ictal                      | 5  |                                                                                 |                                                                                                           | V = 0           | 0.0078    |
| 5e | preictal to ictal                   | 5  |                                                                                 |                                                                                                           | V = 0           | 0.0078    |
| 5f | basal to preictal                   | 5  | Wilcoxon signed rank test                                                       | n(+/+ & +/-) = 6<br>n(-/-) = 8                                                                            | V = 17          | 0.95      |
| 5f | basal to ictal                      | 5  |                                                                                 |                                                                                                           | V = 0           | 0.0078    |
| 5f | preictal to ictal                   | 5  |                                                                                 |                                                                                                           | V = 0           | 0.0078    |
| 5g | +/+ & +/- to -/- (after stimuli)    | 5  | Two-sided Wilcoxon rank-sum test                                                | n(+/+ & +/-) = 5<br>n(-/-) = 5                                                                            | W = 94          | 8.7e-4    |
| 5h | +/+ & +/- to -/- (after stimuli)    | 5  |                                                                                 |                                                                                                           | W = 95          | 6.7e-4    |
| 5i | +/+ and +/- to -/-                  | 5  | Welch two sample unpaired t-test                                                | n(+/+ & +/-) = 6<br>n(-/-) = 8                                                                            | t(7.9) = 3.3    | 0.011     |
| 5j | +/+ and +/- to -/-                  | 5  | Two-sided Wilcoxon rank-sum test                                                | n(+/+ & +/-) = 6<br>n(-/-) = 8                                                                            | W = 15339       | 0.0011    |
| 5k | +/+ and +/- to -/-                  | 5  |                                                                                 |                                                                                                           | W = 44420       | 0.052     |
| 5l | +/+ and +/- to -/-                  | 5  |                                                                                 |                                                                                                           | W = 42282       | 0.37      |
| 5m | +/+ to -/-: <i>eaat1b</i>           | 5  | Welch two sample unpaired t-test                                                | 4 biol. samples each,<br>n(+/+) = 28-59 ( $\bar{x}$ 48)<br>n(-/-) = 24-56 ( $\bar{x}$ 46)                 | t(5.7) = -6.5   | 7.5e-4    |
| 5m | +/+ to -/-: <i>eaat2b</i>           | 5  |                                                                                 |                                                                                                           | t(6.0) = -0.074 | 0.94      |
| 5m | +/+ to -/-: <i>gad1b</i>            | 5  |                                                                                 |                                                                                                           | t(6.0) = -3.0   | 0.024     |
| 5m | +/+ to -/-: <i>mglur3</i>           | 5  |                                                                                 | 3 biol. samples each,<br>n(+/+) = 50-59 ( $\bar{x}$ 55)<br>n(-/-) = 47-56 ( $\bar{x}$ 53)                 | t(5.9) = 0.19   | 0.86      |
| 5m | +/+ to -/-: <i>gabral</i>           | 5  |                                                                                 |                                                                                                           | t(3.9) = 0.95   | 0.40      |
| 5m | +/+ to -/-: <i>mglur5b</i>          | 5  |                                                                                 |                                                                                                           | t(3.9) = 0.94   | 0.40      |

**Supplementary Table 3: Statistical analyses**



## SUPPLEMENTARY METHODS

### TdT-mediated dUTP-biotin nick end labeling (TUNEL)

Offspring of *eaat2a*<sup>+/-</sup> fish was raised in 1x 1-phenyl-2-thiourea (PTU). At 3, 4 and 5 dpf, larvae were anesthetized on ice and fixed in 4% paraformaldehyde (PFA) at 4°C overnight. After washing in 1x PBT (0.1% Tween20 (Sigma-Aldrich) in 1x PBS), larvae were dehydrated in series of increasing methanol concentrations in 1x PBT (25%, 50%, 75%, 100% methanol), stored at -20°C for at least 2h, rehydrated in reverse methanol series, and quickly washed in 1x PBT. Larvae were then digested with Proteinase K (30 µg/mL) for 50 min (3 dpf), 60 min (4 dpf), or 75 min (5 dpf) respectively. After digestion and brief wash in PBT, larvae were fixed first in 4% PFA at room temperature (RT), then in pre-chilled (-20°C) ethanol:acetic acid 2:1 for 20 min each. Washing PBT was then replaced by Equilibrium buffer (ApopTag Peroxycase In Situ Apoptosis Detection Kit S7100, MILLIPORE) for 1-2 hours at RT. After removing Equilibrium buffer, larvae were incubated in Reaction buffer and TdT enzyme according to the kit at 37°C overnight. The next day, larvae were washed first 3h in working strength Stop/Wash buffer from the kit at 37°C, then three times in 1x PBT at RT. After blocking at least 2 hours in blocking buffer (0.1 mg/mL bovine serum albumine, 5% normal goat serum in 1x PBT), larvae were incubated in anti-DIG AP antibody (Roche, 1:5'000 in blocking buffer) at 4°C overnight. The next day, larvae were washed first ten times in 1x PBT, then in 0.1M Tris-HCl (Sigma-Aldrich) pH 9.5 with 0.1% Tween20, and finally in NTMT (0.1M Tris-HCl pH 9.5, 0.1M NaCl, 0.05M MgCl<sub>2</sub>, 0.1% Tween20, 0.001M Levamisol in ddH<sub>2</sub>O). Staining was performed in fresh NTMT containing 3.5 µL/mL 5-bromo-4-chloro-3-indolyl phosphate (BCIP, Roche) and 2.25 µL/mL nitro blue tetrazolium (NBT, Roche) for 15-25 minutes, then stopped by washing the larvae five times in 1x PBT. After stepwise glycerol series (25% and 50% in 1x PBT), larvae were kept at least overnight at 4°C in 70% glycerol in 1x PBT. Before imaging, larvae were incubated in 100% glycerol for at least 1 hour at RT. Z-stack images were acquired on an Olympus BX61 microscope using DIC optics and analysed by a minimum intensity projection using Fiji (ImageJ). Apoptotic cells were counted manually in a blinded fashion using the cell counter plugin of Fiji (ImageJ). Statistical analysis was done by Dunn Kruskal-Wallis multiple comparison test (p-adjustment: Benjamini-Hochberg method) using FSA package in R software version 3.6.0 with the RStudio version 1.2.1335 interface (R Core Team, 2019; RStudio Team, 2018). Imaged larvae were subsequently washed several times in 1x PBT and genotyped for *eaat2a*.
